# Supplementary material
Source: Springer Nature journal article supplement (https://www.springermedizin.de/resource/supplementary/13099_2010_41_MOESM2_ESM.pdf/9665386)
Supplement: MOESM2 [file 9665386]

# Dendrogram A

Similarity

Smal

Kpnl

Serotype

ERY NAL CIP AZM AMP CL CM KM NM GM SM CF TE SXT SU

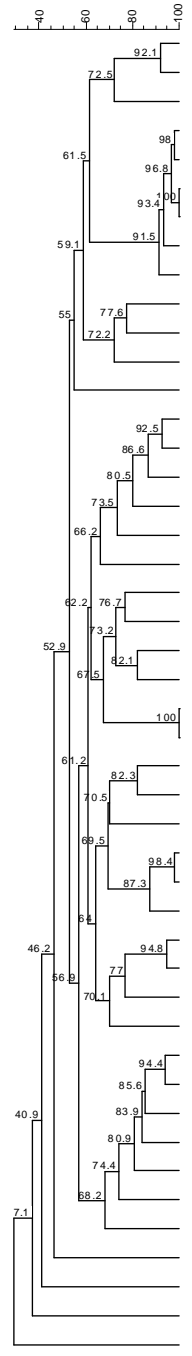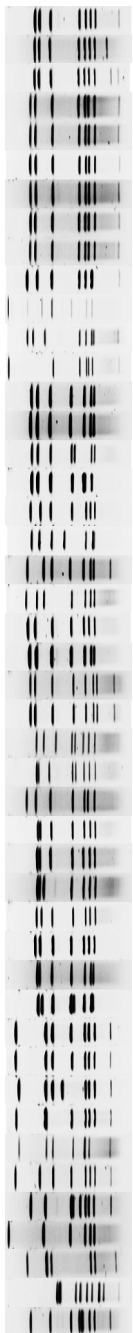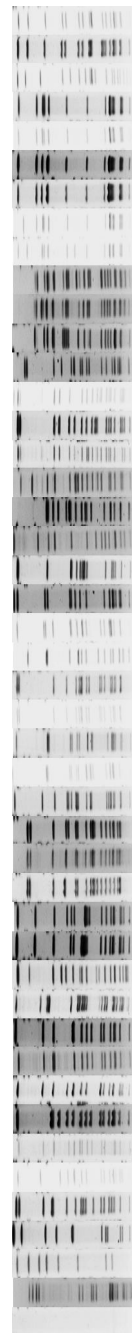

|           |    |   |   |   |   |   |   |   |   |   |   |   |   |   |   |   |
|-----------|----|---|---|---|---|---|---|---|---|---|---|---|---|---|---|---|
| Untypable | S  | R | R | S | S | S | S | S | S | S | S | S | R | R | R | S |
| Untypable | ND | R | R | S | S | S | S | S | S | S | S | S | R | R | R | S |
| Untypable | S  | R | I | S | S | S | S | S | S | S | S | S | R | I | S | S |
| HL:36     | S  | S | S | S | S | S | S | S | S | S | S | S | R | S | R | S |
| Untypable | S  | S | S | S | S | S | S | S | S | S | S | S | R | S | S | S |
| HL:36     | S  | R | R | S | R | S | S | S | S | S | S | S | R | R | R | S |
| HL:36     | S  | R | R | S | S | S | S | S | S | S | S | S | R | R | R | R |
| Untypable | S  | R | I | S | S | S | S | S | S | S | S | S | R | S | S | S |
| Untypable | S  | R | R | S | S | S | S | S | S | S | S | S | R | R | R | S |
| Untypable | S  | R | R | S | S | S | S | S | S | S | S | S | R | S | R | S |
| Untypable | S  | R | R | S | R | S | S | S | S | S | S | S | R | R | R | S |
| Untypable | S  | R | R | S | R | S | S | S | S | S | S | S | R | R | R | S |
| HL:41     | S  | R | R | S | S | S | S | S | S | S | S | S | R | R | S | S |
| Untypable | S  | R | R | S | R | S | S | S | S | S | S | S | R | R | S | S |
| HL:11     | S  | R | R | S | S | S | S | S | S | S | S | S | R | R | R | I |
| HL:11     | S  | R | R | S | R | S | S | S | S | S | S | S | R | R | R | R |
| HL:11     | S  | R | R | S | R | S | S | S | S | S | S | S | R | R | S | S |
| HL:7      | S  | R | R | S | S | S | S | S | S | S | S | S | R | S | S | S |
| Untypable | S  | R | R | S | I | S | S | S | S | S | S | S | R | R | R | S |
| HL:4      | S  | R | I | S | S | S | S | S | S | S | S | S | R | S | R | S |
| Untypable | S  | R | R | S | S | S | S | S | S | S | S | S | R | I | S | S |
| Untypable | S  | R | R | S | R | S | S | S | S | S | S | S | R | R | S | S |
| Untypable | S  | R | R | S | S | S | S | S | S | S | S | S | R | R | R | S |
| HL:17     | ND | R | R | S | S | S | S | S | S | S | S | S | R | R | R | R |
| Untypable | S  | R | R | S | S | S | S | S | S | S | S | S | R | R | S | S |
| Untypable | S  | R | R | S | S | S | S | S | S | S | S | S | R | R | R | S |
| Untypable | S  | R | R | S | S | S | S | S | S | S | S | S | R | R | S | S |
| HL:114    | S  | R | R | S | R | S | S | S | S | S | S | S | R | R | S | S |
| Untypable | S  | R | R | S | S | S | S | S | S | S | S | S | R | R | R | R |
| HL:114    | S  | R | R | S | S | S | S | S | S | S | S | S | R | R | R | S |
| HL:28     | S  | R | R | S | R | S | S | S | S | S | S | S | R | R | S | S |
| HL:28     | S  | R | R | S | R | S | S | S | S | S | S | S | R | R | S | S |
| HL:86     | S  | S | S | S | S | S | S | S | S | S | S | S | R | S | R | R |
| Untypable | S  | R | R | S | S | S | S | S | S | S | S | S | R | S | S | S |
| HL:5      | S  | R | R | S | R | S | S | S | S | S | S | S | R | I | S | S |
| HL:5      | S  | R | R | S | S | S | S | S | S | S | S | S | R | R | R | S |
| Untypable | S  | R | R | S | R | S | S | S | S | S | S | S | R | R | S | S |
| Untypable | R  | R | R | R | R | S | S | S | S | S | S | S | R | R | S | S |
| HL:102    | R  | R | R | R | S | S | S | S | S | S | S | S | R | R | R | S |
| Untypable | R  | R | R | R | R | S | S | S | S | S | S | S | R | R | R | S |
| HL:4      | S  | R | R | S | S | S | S | S | S | S | S | S | R | R | R | S |
| HL:6      | S  | R | R | S | S | S | S | S | S | S | S | S | R | R | I | S |
| HL:17     | ND | R | R | S | S | S | S | S | S | S | S | S | R | S | R | S |
| Untypable | S  | R | R | S | S | S | S | S | S | S | S | S | R | R | R | S |
| Untypable | ND | R | R | S | S | S | S | S | S | S | S | S | R | R | R | S |
